# Supplementary material
Source: PubMed Central journal article supplement (PMC3431707)
Supplement: supp_M112.385757_jbc.M112.385757-1.pdf [file supp_M112.385757_jbc.M112.385757-1.pdf]

Supplementary Figure 1

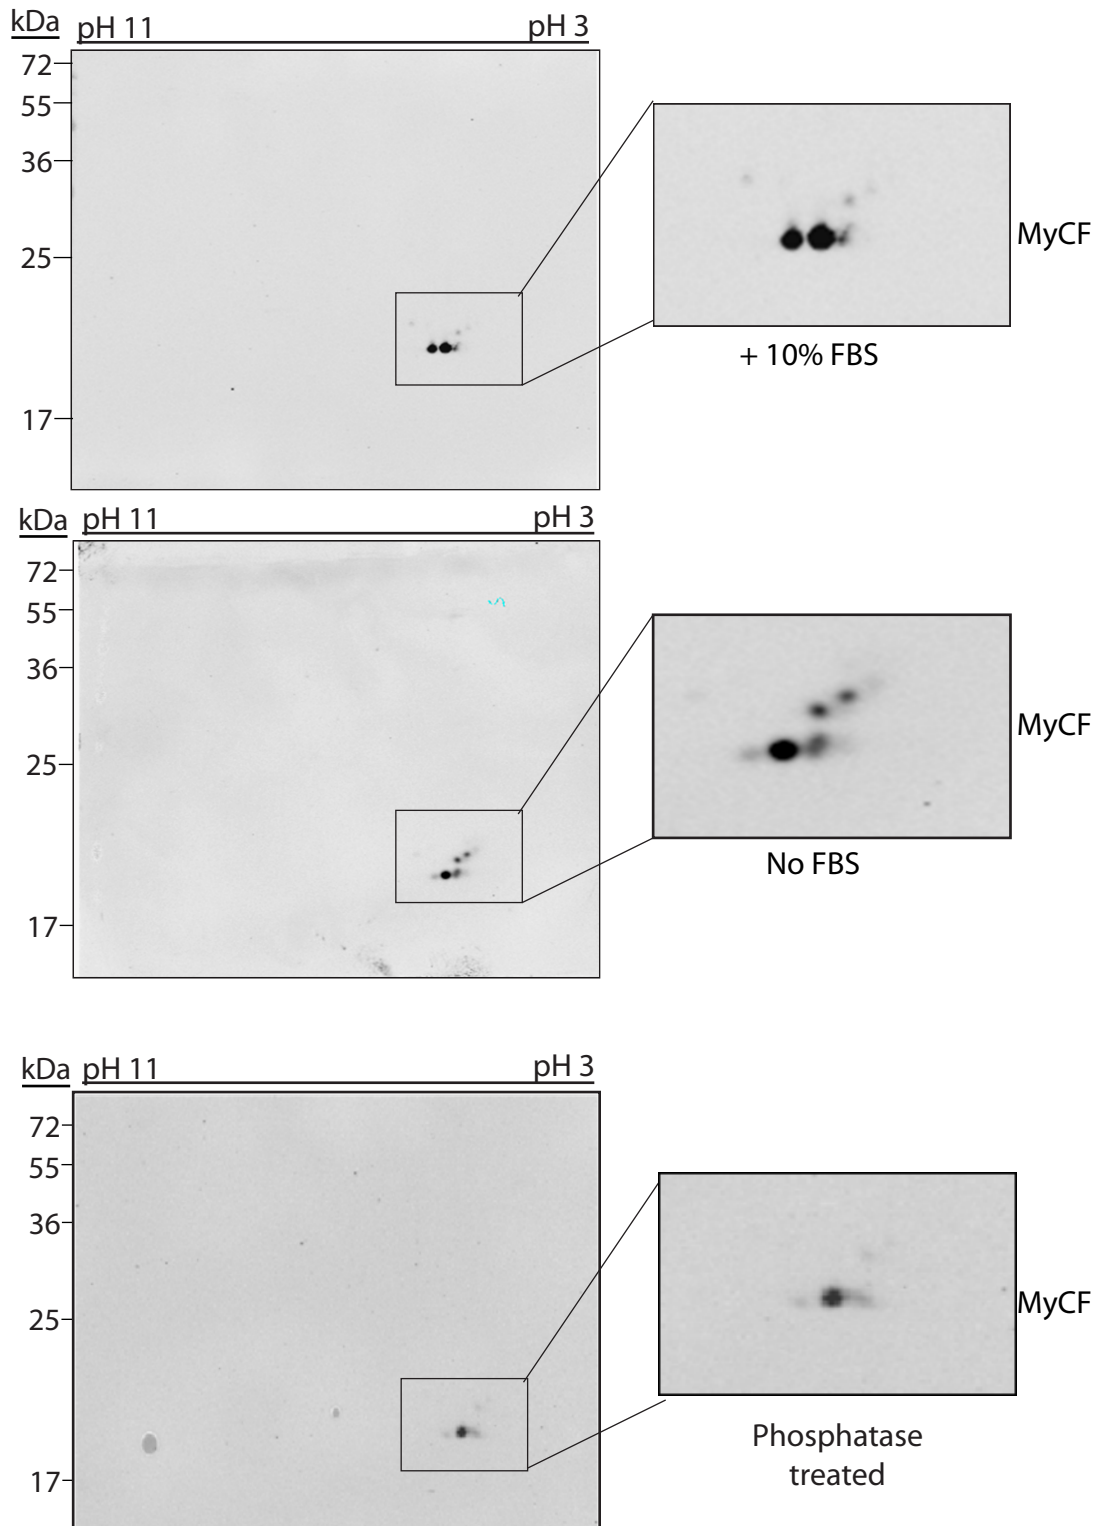

2D PAGE analysis of total cell lysates prepared from MCF-7 cells transiently transfected with pcDNA3 MyCF WT cultured in the presence or absence of FBS, no FBS, or no FBS plus tShrimp Alkaline Phosphatase (SAP).
